# Supplementary material
Source: publisher figshare collection journal article supplement (https://karger.figshare.com/ndownloader/files/30683381)
Supplement: Supplementary file 1 [file 30683381]

**SUPPLEMENTAL MATERIAL**

**N. Gehring et al. Jak1/Stat3 activation alters phosphate metabolism independently of sex and extracellular phosphate levels**

**SUPPLEMENTAL TABLES**

**TABLE S1. Mineral metabolism parameters in wildtype female and male mice.**

Animals with a C3HeB/FeJ genetic background, at 12-14 weeks of age and under a customized standard phosphate diet (0.6 % phosphorous, 1% calcium, and 600 IU/kg cholecalciferol; ssniff Spezialdiäten GmbH, Germany) for 6 to 10 weeks.

|  | **Female** | | **Male** | |  |
| --- | --- | --- | --- | --- | --- |
| **Parameter** | **Mean ± SEM** | **n** | **Mean ± SEM** | **n** | **P value** |
| Plasma phosphate (mM) | 2.6 ± 0.14 | 7 | 2.8 ± 0.04 | 7 | 0.2193 |
| Total plasma calcium (mM) | 2.23 ± 0.02 | 7 | 2.19 ± 0.03 | 7 | 0.3009 |
| Intact FGF23 (ng/ml) | 243.06 ± 22.17 | 9 | 206.78 ± 11.68 | 9 | 0.1731 |
| PTH (ng/ml) | 194.71 ± 13.69 | 9 | 298.69 ± 24.87 | 9 | 0.0031 |
| Calcitriol (pg/ml) | 48.76 ± 9.26 | 8 | 58.18 ± 9.49 | 7 | 0.4902 |
| Total plasma iron (µM) | 34.65 ± 1.03 | 5 | 35.62 ± 1.14 | 5 | 0.5480 |
| Phosphate/creatinine urine (mM/mM) | 33.56 ± 2.22 | 8 | 27.46 ± 3.17 | 6 | 0.1479 |
| Calcium/creatinine urine (mM/mM) | 0.51 ± 0.06 | 6 | 0.42 ± 0.09 | 6 | 0.4587 |
| Plasma creatinine (µM) | 7.74 ± 0.57 | 8 | 7.56 ± 0.97 | 9 | 0.8809 |
| BUN (mM) | 13.83 ± 0.56 | 8 | 17.14 ± 0.88 | 9 | 0.0073 |
